# Supplementary material for: The Association of Atrial Fibrillation Before Percutaneous Coronary Intervention With 1-Year Outcome in ST-Elevation Myocardial Infarction Patients
Source: PubMed Central journal article supplement — CJC Open. 2021 Jun 4;3(10):1221–9. doi: 10.1016/j.cjco.2021.06.001 (PMC8636243; doi:10.1016/j.cjco.2021.06.001), 2021-06-04
Supplement: mmc1.pdf [file mmc1.pdf]

## Supplementary Material

**Supplemental Table S1. Primary and secondary outcomes at 1 year, according to the rhythm on the pre-PCI ECG - patients with prior oral anticoagulation excluded**

| Outcomes                                      | AF/Flutter<br>(N=369) | Sinus rhythm<br>(N=8321) | Unadjusted       |            | Adjusted*        |            |
|-----------------------------------------------|-----------------------|--------------------------|------------------|------------|------------------|------------|
|                                               |                       |                          | HR<br>(95% CI)   | P<br>Value | HR<br>(95% CI)   | P<br>Value |
| <b>Primary and secondary outcomes</b>         |                       |                          |                  |            |                  |            |
| Primary outcome                               | 60 (16.3%)            | 610 (7.3%)               | 2.35 (1.80-3.07) | <0.001     | 1.74 (1.31-2.30) | <0.001     |
| Cardiovascular death                          | 35 (9.5%)             | 270 (3.2%)               | 3.04 (2.14-4.32) | <0.001     | 1.94 (1.33-2.82) | <0.001     |
| Recurrent MI                                  | 10 (2.7%)             | 200 (2.4%)               | 1.18 (0.62-2.22) | 0.617      | 1.04 (0.54-1.97) | 0.915      |
| Cardiogenic shock                             | 14 (3.8%)             | 150 (1.8%)               | 2.16 (1.24-3.75) | 0.006      | 1.62 (0.90-2.91) | 0.107      |
| Class IV Heart failure                        | 17 (4.6%)             | 155 (1.9%)               | 2.60 (1.57-4.29) | <0.001     | 1.91 (1.14-3.18) | 0.013      |
| CVD, MI, CardShock, HF, Stent thrombosis, TVR | 73 (19.8%)            | 900 (10.8%)              | 1.95 (1.54-2.48) | <0.001     | 1.53 (1.20-1.97) | <0.001     |
| All-Cause Mortality                           | 41 (11.1%)            | 322 (3.9%)               | 2.99 (2.16-4.15) | <0.001     | 1.88 (1.34-2.66) | <0.001     |
| Stent Thrombosis                              | 5 (1.4%)              | 164 (2.0%)               | 0.71 (0.29-1.73) | 0.455      | 0.59 (0.24-1.44) | 0.242      |
| Definite stent Thrombosis                     | 4 (1.1%)              | 115 (1.4%)               | 0.81 (0.30-2.18) | 0.670      | 0.73 (0.27-2.00) | 0.539      |
| Target vessel revascularization               | 17 (4.6%)             | 444 (5.3%)               | 0.90 (0.56-1.47) | 0.678      | 0.84 (0.52-1.38) | 0.498      |
| Major bleeding                                | 8 (2.2%)              | 150 (1.8%)               | 1.25 (0.61-2.54) | 0.541      | 0.99 (0.48-2.03) | 0.981      |
| <b>Safety outcome</b>                         |                       |                          |                  |            |                  |            |
| Stroke                                        | 6 (1.6%)              | 75 (0.9%)                | 1.89 (0.82-4.33) | 0.135      | 1.10 (0.44-2.75) | 0.846      |
| TIA                                           | 1 (0.3%)              | 19 (0.2%)                | 1.24 (0.17-9.27) | 0.833      | 1.04 (0.14-7.85) | 0.973      |
| Stroke/TIA                                    | 7 (1.9%)              | 93 (1.1%)                | 1.77 (0.82-3.82) | 0.144      | 1.11 (0.48-2.57) | 0.805      |
| <b>Net risk-benefit risk outcome</b>          |                       |                          |                  |            |                  |            |
| CVD, MI, CardShock, HF, Stroke                | 63 (17.1%)            | 656 (7.9%)               | 2.30 (1.77-2.99) | <0.001     | 1.67 (1.27-2.20) | <0.001     |

\* Adjusted for age, symptom onset (6-12hrs vs. <6hrs), gender, MI type, current smoking, previous hypertension, previous diabetes, previous MI, previous PCI, proximal lesion, previous stroke and Killip class

**Supplemental Table S2. Effect of treatments on primary outcome and components, subgrouped by rhythm on the pre-PCI ECG**

| <b>Outcomes</b>        | <b>Subgroup</b> | <b>Thrombectomy<sup>a</sup></b> | <b>PCI alone<sup>a</sup></b> | <b>HR (95% CI)</b> | <b>P value †</b> |
|------------------------|-----------------|---------------------------------|------------------------------|--------------------|------------------|
| Primary outcome        | SR              | 307/4252 (7.2)                  | 310/4141 (7.5)               | 0.96 (0.82-1.13)   | 0.263            |
|                        | AF              | 42/218 (19.3)                   | 34/219 (15.5)                | 1.27 (0.80-2.00)   |                  |
| CV death               | SR              | 135/4252 (3.2)                  | 139/4141 (3.4)               | 0.94 (0.74-1.20)   | 0.542            |
|                        | AF              | 23/218 (10.6)                   | 20/219 (9.1)                 | 1.16 (0.63-2.11)   |                  |
| Recurrent MI           | SR              | 104/4252 (2.4)                  | 100/4141 (2.4)               | 1.01 (0.77-1.33)   | 0.568            |
|                        | AF              | 7/218 (3.2)                     | 5/219 (2.3)                  | 1.42 (0.45-4.48)   |                  |
| Cardiogenic shock      | SR              | 75/4252 (1.8)                   | 78/4141 (1.9)                | 0.93 (0.68-1.28)   | 0.728            |
|                        | AF              | 7/218 (3.2)                     | 9/219 (4.1)                  | 0.78 (0.29-2.10)   |                  |
| Class IV heart failure | SR              | 80/4252 (1.9)                   | 77/4141 (1.9)                | 1.01 (0.74-1.38)   | 0.433            |
|                        | AF              | 14/218 (6.4)                    | 10/219 (4.6)                 | 1.43 (0.63-3.22)   |                  |

<sup>a</sup>Values are given as no. of events/no. of patients (%).

†P value for interaction is from likelihood ratio test of interaction term, using unadjusted Cox regression model. For abbreviations, see previous tables.

**Supplemental Table S3. Primary and secondary outcomes at 1 year, according to use of OAC or antiplatelet drug at discharge in AF/flutter patients**

| <b>Outcome</b>  | <b>OAC<sup>a</sup><br/>(N=120)</b> | <b>Antiplatelet drug<sup>a</sup><br/>(N=293)</b> | <b>Unadjusted HR<br/>(95% CI)</b> | <b>P Value</b> |
|-----------------|------------------------------------|--------------------------------------------------|-----------------------------------|----------------|
| Primary outcome | 21 (17.5%)                         | 32 (10.9%)                                       | 1.67 (0.96-2.90)                  | 0.069          |
| Recurrent MI    | 4 (3.3%)                           | 8 (2.7%)                                         | 1.22 (0.37-4.07)                  | 0.741          |
| Major bleeding  | 8 (6.7%)                           | 5 (1.7%)                                         | 4.02 (1.31-12.3)                  | 0.015          |
| Stroke          | 9 (7.5%)                           | 2 (0.7%)                                         | 11.4 (2.46-52.7)                  | 0.002          |
| TIA             | 1 (0.8%)                           | 0 (0.0%)                                         | -                                 | -              |
| Stroke/TIA      | 10 (8.3%)                          | 2 (0.7%)                                         | 12.7 (2.78-58.0)                  | 0.001          |
